# Supplementary material
Source: MDPI journal article supplement (https://www.mdpi.com/2220-9964/2/3/598)
Supplement: s1 [file s1 › ijgi-02-00598-note.pdf]

# Indoor Positioning for Smartphones Using Asynchronous Ultrasound Trilateration

Viacheslav Filonenko \*, Charlie Cullen and James D. Carswell

Digital Media Centre, Dublin Institute of Technology, Dublin 2, Ireland;  
E-Mails: charlie.cullen@dmc.dit.ie (C.C.); jcarswell@dit.ie (J.D.C.)

\* Author to whom correspondence should be addressed; E-Mail: viacheslav.filonenko@dit.ie;  
Tel.: +353-1-402-3264; Fax: +353-1-402-3269.

Figure 3 (Experiment 3 Error Vectors) on page 611 has a mistake. The correct version is listed below.

**Figure 3.** The position of 10 test locations or check points (centerpoint of 1 m diameter circles) and error vector direction and distance from true position to MPV for Experiments 1, 2, and 3.

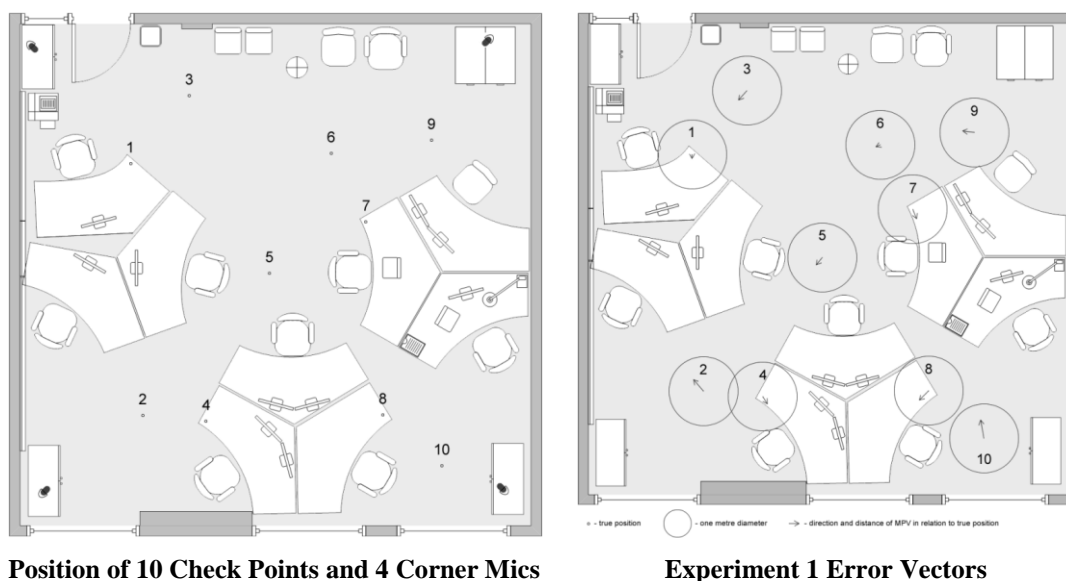

**Figure 3. Cont.**

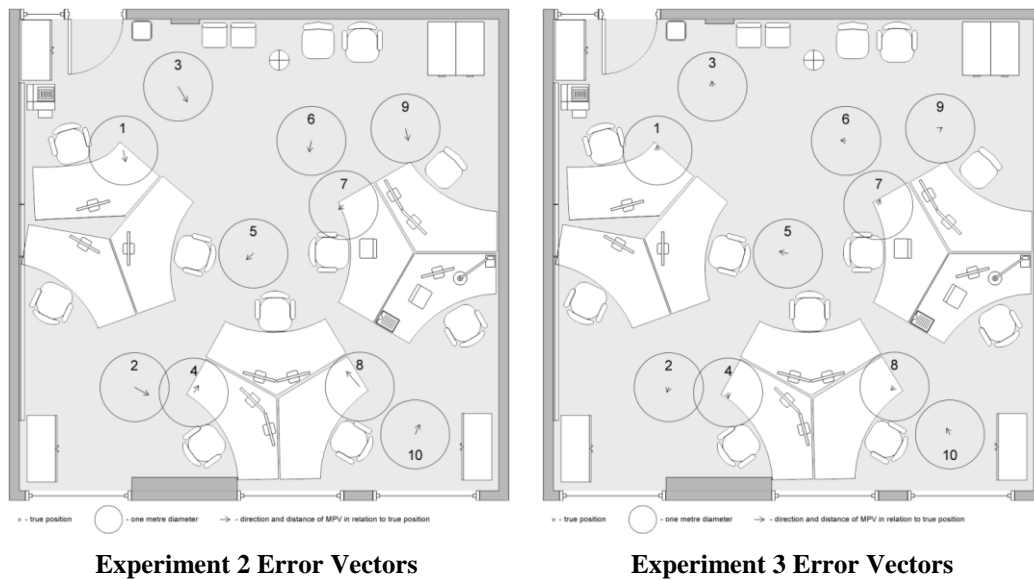

We apologize for any inconvenience this may have caused.

© 2014 by the authors; licensee MDPI, Basel, Switzerland. This article is an open access article distributed under the terms and conditions of the Creative Commons Attribution license (<http://creativecommons.org/licenses/by/3.0/>).
